# Supplementary material for: Impact of the great east Japan earthquake on the body mass index of preschool children: a nationwide nursery school survey
Source: PubMed Central journal article supplement (PMC4838714; doi:10.1136/bmjopen-2015-010978), 2016-04-07
Supplement: bmjopen-2015-010978supp.pdf [file bmjopen-2015-010978supp.pdf]

## Supplementary Materials

**Supplementary Table 1** Estimated mean body mass indices for children residing in the affected Fukushima, Miyagi and Iwate prefectures and in unaffected areas also located in northeast Japan

| Time point   | Boys      |           |          |             | Girls     |           |          |             |
|--------------|-----------|-----------|----------|-------------|-----------|-----------|----------|-------------|
|              | Fukushima | Miyagi (n | Iwate (n | Unaffected* | Fukushima | Miyagi (n | Iwate (n | Unaffected* |
|              | (n = 646) | = 904)    | = 483)   | (n = 1707)  | (n = 597) | = 854)    | = 458)   | (n = 1658)  |
| April 2008   | 16.34     | 16.45     | 16.43    | 16.38       | 16.21     | 16.33     | 16.26    | 16.38       |
| October 2008 | 16.08     | 16.17     | 16.23    | 16.14       | 15.97     | 16.12     | 16.11    | 16.14       |
| April 2009   | 15.97     | 15.99     | 16.05    | 16.00       | 15.96     | 15.90     | 15.95    | 16.00       |
| October 2009 | 15.73     | 15.83     | 15.85    | 15.83       | 15.78     | 15.79     | 15.79    | 15.83       |
| April 2010   | 15.73     | 15.81     | 15.76    | 15.78       | 15.73     | 15.76     | 15.73    | 15.78       |
| October 2010 | 15.63     | 15.65     | 15.57    | 15.64       | 15.66     | 15.62     | 15.56    | 15.64       |
| April 2011   | 15.73     | 15.74     | 15.75    | 15.64       | 15.74     | 15.70     | 15.69    | 15.64       |
| October 2011 | 15.63     | 15.54     | 15.59    | 15.56       | 15.61     | 15.52     | 15.58    | 15.56       |
| April 2012   | 15.78     | 15.61     | 15.70    | 15.71       | 15.82     | 15.61     | 15.61    | 15.71       |
| October 2012 | 15.88     | 15.62     | 15.74    | 15.73       | 15.91     | 15.59     | 15.64    | 15.73       |

All values are reported as kg/m<sup>2</sup>.

\*Unaffected refers to three unaffected prefectures of northeast Japan (Yamagata, Akita and Aomori).
